# Supplementary material for: MicroRNA-21 and microRNA-148a affects PTEN, NO and ROS in canine leishmaniasis
Source: Frontiers journal article supplement (doi:10.3389/fgene.2023.1106496), 2023-04-13
Supplement: Data_Sheet_1.PDF [file Data_Sheet_1.PDF]

**Supplementary Figure 1. PCR-RFLP analysis in CanL samples.**

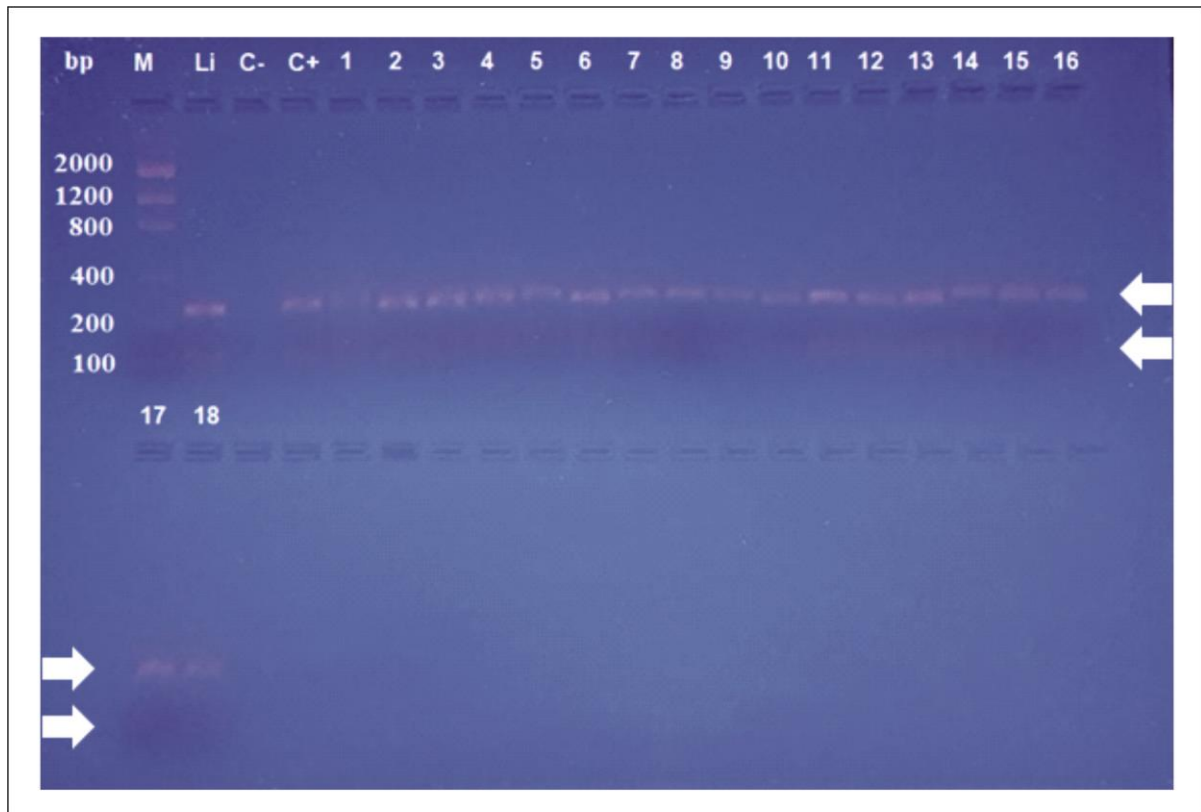

**Supplementary Figure 1:** Restriction fragment length polymorphism analysis with ITS1-PCR fragments amplified from DNA samples using Hae III. M: molecular marker (100 bp); C-: Negative control (water); C+: positive control; Li: *Leishmania infantum* (IOC / L0575-MHOM / BR / 2002 / LPC – RPV); The samples were identified as one to 18 and are identical to the *L. infantum* profile.
